# Supplementary material for: A component overlapping attribute clustering (COAC) algorithm for single-cell RNA sequencing data analysis and potential pathobiological implications
Source: PubMed Central journal article supplement (PMC6396937; doi:10.1371/journal.pcbi.1006772), 2019-02-19
Supplement: pcbi.1006772.s003.pdf [file pcbi.1006772.s003.pdf]

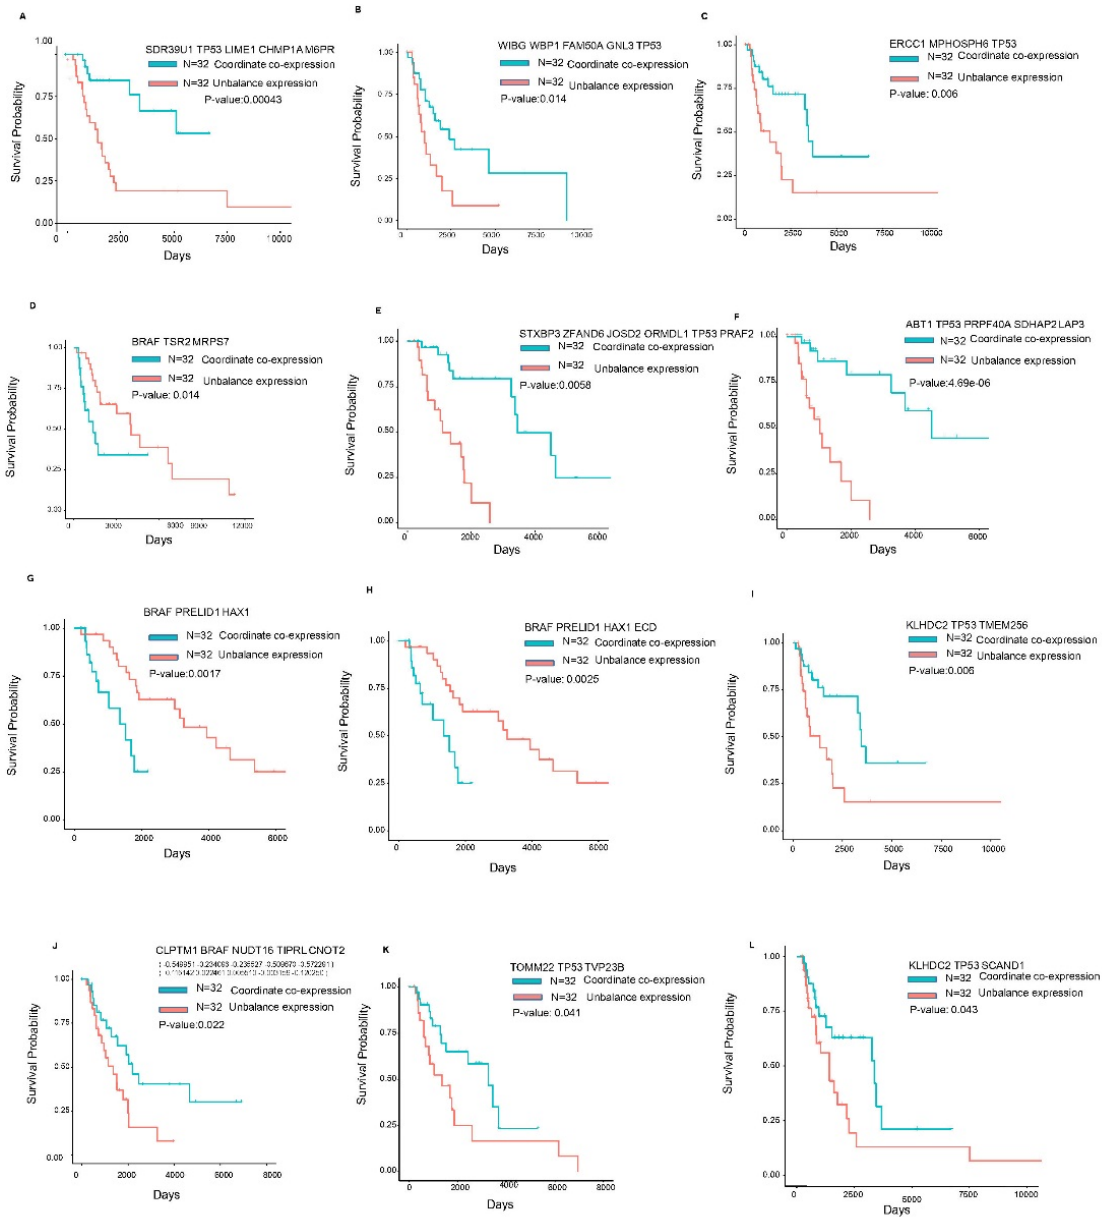

**S2 Fig. Survival analysis for top 12 selected COAC-inferred gene co-expression subnetworks from scRNA-seq data in Melanoma patients.** The top selected subnetwork for each survival analysis was highlighted in each subfigure. The bulk RNA-seq data and clinical profiles for each melanoma patients were collected from TCGA website [2]. Survival analysis was conducted for these two groups using the R survival package [3].
