# Supplementary material for: A component overlapping attribute clustering (COAC) algorithm for single-cell RNA sequencing data analysis and potential pathobiological implications
Source: PubMed Central journal article supplement (PMC6396937; doi:10.1371/journal.pcbi.1006772), 2019-02-19
Supplement: pcbi.1006772.s004.pdf [file pcbi.1006772.s004.pdf]

**A**

$$\left( \begin{array}{c} \text{Gk} \\ \text{Gt} \\ \dots \end{array} \right) = W_1 \left| \begin{array}{c} \text{Gk} \\ \text{Gt} \\ \dots \end{array} \right\rangle + W_2 \left| \begin{array}{c} \text{Gk} \\ \text{Gt} \\ \dots \end{array} \right\rangle$$

**B**

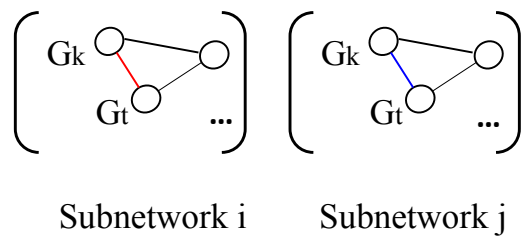

**S3 Fig. A diagram illustrating the process of gene co-expression subnetwork identification by COAC. (A)** Each co-expression sub-network can be treated as a superposition of two different gene expression state. **(B)** The gene co-expression relationship can be represented by different subnetworks.
