# Supplementary material for: A component overlapping attribute clustering (COAC) algorithm for single-cell RNA sequencing data analysis and potential pathobiological implications
Source: PubMed Central journal article supplement (PMC6396937; doi:10.1371/journal.pcbi.1006772), 2019-02-19
Supplement: pcbi.1006772.s005.pdf [file pcbi.1006772.s005.pdf]

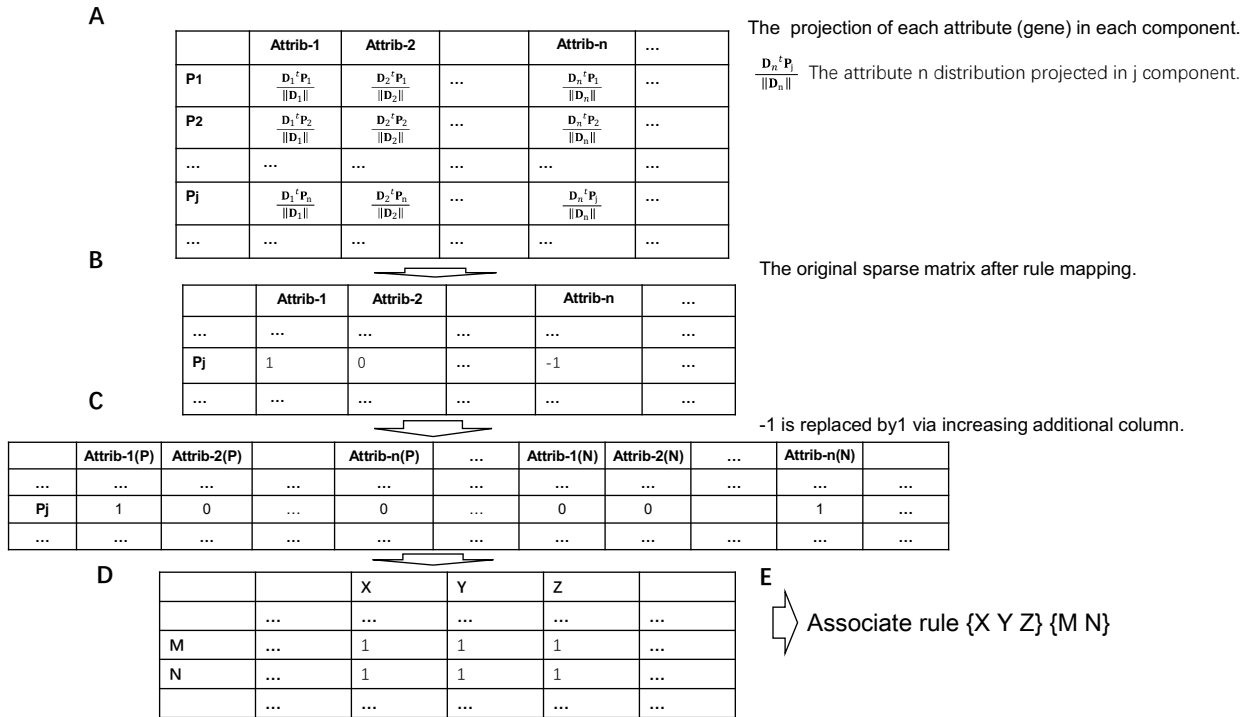

**S4 Fig. A diagram illustrating matrix factorization method for gene co-expression subnetwork identification. (A and B)** The projection of each attribute distribution over each principal component distribution. **(C)** A binary matrix composed of 1 or 0 after rule mapping. **(D and E)** Associate rules were obtained from the sub-tables of binary matrix whose all elements are no-zero. For the domain of “-1”, we translated “-1” to “1” by increasing an additional column.
