# Supplementary material for: A component overlapping attribute clustering (COAC) algorithm for single-cell RNA sequencing data analysis and potential pathobiological implications
Source: PubMed Central journal article supplement (PMC6396937; doi:10.1371/journal.pcbi.1006772), 2019-02-19
Supplement: pcbi.1006772.s007.pdf [file pcbi.1006772.s007.pdf]

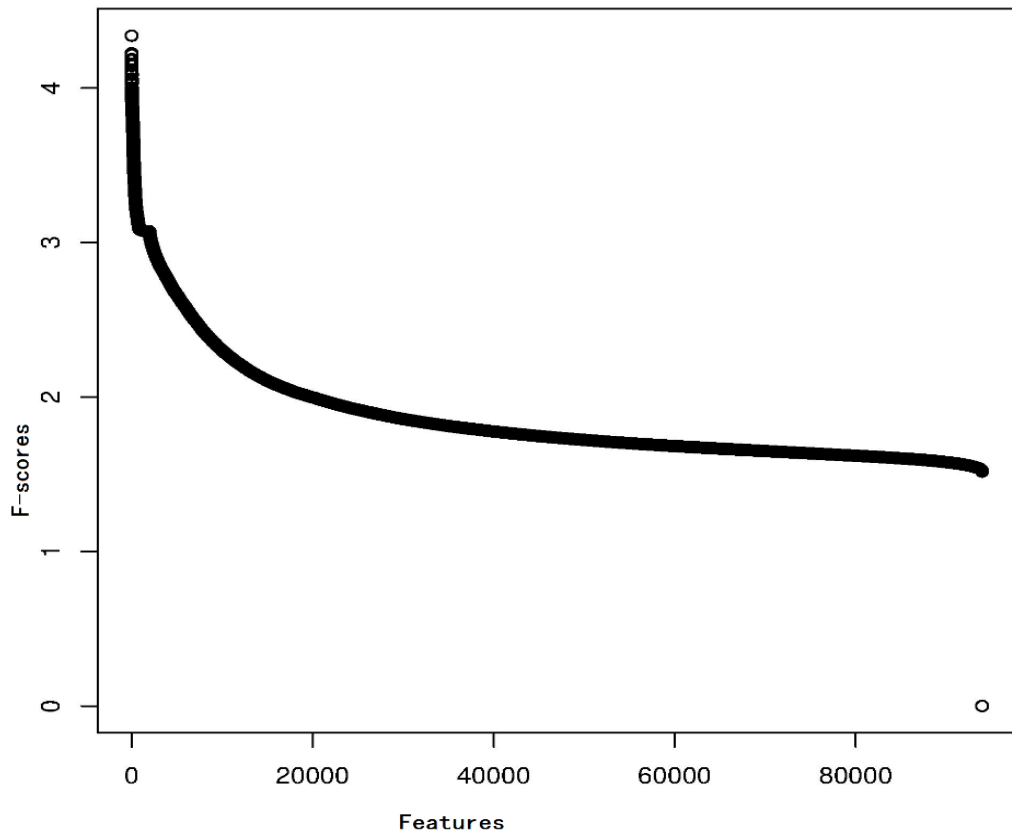

**S6 Fig. Distribution of the ratio (F-score) of the differential variance and background variance.**
