# Supplementary material for: A component overlapping attribute clustering (COAC) algorithm for single-cell RNA sequencing data analysis and potential pathobiological implications
Source: PubMed Central journal article supplement (PMC6396937; doi:10.1371/journal.pcbi.1006772), 2019-02-19
Supplement: pcbi.1006772.s008.pdf [file pcbi.1006772.s008.pdf]

**Binary distribution matrix**

**Principle components contribution in each attributes**

| Attribute Name<br>Component ID | RMND1 | ANKRD54 | MC2R | Attribute Name<br>Component ID | RMND1  | ANKRD54 | MC2R   |
|--------------------------------|-------|---------|------|--------------------------------|--------|---------|--------|
| 2015                           | 1     | 1       | 1    | 2015                           | -4.012 | -4.903  | -1.069 |
| 641                            | 1     | 1       | 1    | 641                            | 4.436  | 3.949   | 0.872  |
| 281                            | X     | X       | X    | 281                            | 1.093  | 1.369   | 0.273  |
| 609                            | X     | X       | X    | 609                            | 1.261  | 1.342   | 0.286  |
| 899                            | X     | X       | X    | 899                            | -1.577 | -1.688  | -0.396 |
| 1414                           | X     | X       | X    | 1414                           | -1.238 | -1.115  | -0.269 |
| ...                            | ...   | ...     | ...  | ...                            | ....   | ....    | ....   |

The original components in this closed associate rule which have significant value in binary distribution matrix.

The components which have similar pattern with original components.

X means it is 1/0, not always 1

**S7 Fig. A diagram illustrating the processes of binary distribution matrix analysis and principle components contribution analysis.** The selected components containing all components whose distribution is similar with the components in the component collection of this closed associate rule.

**References**

1. Tirosh I, Izar B, Prakadan SM, Wadsworth MH, Treacy D, Trombetta JJ, et al. Dissecting the multicellular ecosystem of metastatic melanoma by single-cell RNA-seq. Science. 2016; 352(6282):189-96.
2. Bewick V, Cheek L, Ball J. Statistics review 12: survival analysis. Crit. Care. 2004; 8(5):389.
3. Therneau T, Lumley T. Survival: Survival analysis, including penalised likelihood. R package version 2.35-7. R foundation for Statistical Computing 2011.
